# Supplementary material for: Association of soy and fermented soy product intake with total and cause specific mortality: prospective cohort study
Source: PubMed Central journal article supplement — BMJ. 2020 Jan 29;368:m34. doi: 10.1136/bmj.m34 (PMC7190045; doi:10.1136/bmj.m34), 2020-01-29
Supplement: katr049718.ww1.pdf [file katr049718.ww1.pdf]

Supplemental Tables

Supplemental Table 1. Details of soy products included in our food frequency questionnaire (FFQ)

| Type of soy products | Details                                                                                            | How to use or eat      | Nutritional properties*                                                                                                     | Amounts asked in our FFQ                                                                               | Frequency in our FFQ                                                                |                                                                                                                                                |
|----------------------|----------------------------------------------------------------------------------------------------|------------------------|-----------------------------------------------------------------------------------------------------------------------------|--------------------------------------------------------------------------------------------------------|-------------------------------------------------------------------------------------|------------------------------------------------------------------------------------------------------------------------------------------------|
| Miso                 | soybeans <u>fermented</u> with <i>Aspergillus oryzae</i>                                           | Seasoning<br>Miso soup | Fiber: 4.9g/100g<br>Protein: 12.5g/100g<br>Potassium: 380mg/100g<br>Other features: high sodium (4900mg/100g)               | the number of bowls per day                                                                            | 6 categories as miso soup                                                           | almost never, 1–3 days/month, 1–2 days/week, 3–4 days/week, 5–6 days/week, and daily                                                           |
| Tofu                 | soybean curd (produced by boiling soy beans, filtering soy milk out, and coagulated)               | Eat as it is or cooked | Fiber: 0.4g/100g<br>Protein: 6.6g/100g<br>Potassium: 140mg/100g                                                             | 3 categories (less than half the standard, same as the standard, and more than 1.5 times the standard) | 9 categories                                                                        | almost never, 1–3 times/month, 1–2 times/week, 3–4 times/week, 5–6 times/week, once/day, 2–3 times/day, 4–6 times/day, and 7 times/day or more |
| Natto                | soybeans <u>fermented</u> with <i>Bacillus subtilis</i>                                            | Eat as it is           | Fiber: 6.7g/100g<br>Protein: 16.5g/100g<br>Potassium: 660mg/100g<br>Other features: Include fibrinolytic enzyme nattokinase | Same as Tofu                                                                                           | Same 9 categories as Tofu                                                           |                                                                                                                                                |
| Others               | yushidofu (pre-drained tofu), koyadofu (freeze-dried tofu), aburage (deep-fried tofu), and soymilk | Eat as it is or cooked |                                                                                                                             | Same as Tofu except soy milk                                                                           | Same 9 categories as Tofu for products except soy milk<br>9 categories for soy milk | almost never, 1–2 times/week, 3–4 times/week, 5–6 times/week, 1 glass/day, 2–3 glasses/day, 4–6 glasses/day, 7–9                               |

|  |  |  |  |  |  |                                            |
|--|--|--|--|--|--|--------------------------------------------|
|  |  |  |  |  |  | glasses/day, and 10<br>glasses/day or more |
|--|--|--|--|--|--|--------------------------------------------|

\*These values are according to standard tables of food composition in Japan

Supplemental Table 2. Baseline characteristics of participants according to their fermented soy product intake

| Characteristics                                | Men (n=42,750)               |                     |                     |                     |                     | Women (n=50,165)             |                     |                     |                     |                     |
|------------------------------------------------|------------------------------|---------------------|---------------------|---------------------|---------------------|------------------------------|---------------------|---------------------|---------------------|---------------------|
|                                                | Fermented soy product intake |                     |                     |                     |                     | Fermented soy product intake |                     |                     |                     |                     |
|                                                | First                        | Second              | Third               | Fourth              | Fifth               | First                        | Second              | Third               | Fourth              | Fifth               |
| No of participants                             | 8,550                        | 8,550               | 8,550               | 8,550               | 8,550               | 10,033                       | 10,033              | 10,033              | 10,033              | 10,033              |
| Mean (SD) age (years)                          | 56.2 (8.2)                   | 55.9 (7.8)          | 56.0 (7.6)          | 56.3 (7.5)          | 57.2 (7.5)          | 56.7 (8.5)                   | 56.4 (8.1)          | 56.4 (7.7)          | 56.8 (7.5)          | 57.4 (7.5)          |
| Mean (SD) body mass index (kg/m <sup>2</sup> ) | 23.6 (2.9)                   | 23.6 (2.9)          | 23.6 (2.8)          | 23.5 (2.8)          | 23.5 (2.8)          | 23.4 (3.3)                   | 23.4 (3.2)          | 23.5 (3.1)          | 23.5 (3.1)          | 23.5 (3.1)          |
| Current smoker                                 | 48.8                         | 46.7                | 48.4                | 47.5                | 43.5                | 7.9                          | 6.2                 | 5.7                 | 4.8                 | 4.7                 |
| Alcohol intake (≥1 day/week)                   | 67.0                         | 70.0                | 71.1                | 68.8                | 65.3                | 15.9                         | 15.1                | 13.4                | 12.8                | 11.0                |
| Diabetes mellitus                              | 6.1                          | 6.8                 | 6.8                 | 7.1                 | 8.2                 | 3.4                          | 3.6                 | 3.2                 | 3.3                 | 4.5                 |
| Antihypertensive drugs                         | 17.4                         | 17.6                | 18.6                | 18.0                | 19.5                | 18.8                         | 18.4                | 19.1                | 19.8                | 21.1                |
| Health check-up                                | 79.2                         | 81.4                | 83.3                | 83.1                | 84.3                | 81.1                         | 83.1                | 85.0                | 86.5                | 86.3                |
| Sports or physical exercise (almost every day) | 5.5                          | 5.4                 | 5.5                 | 5.2                 | 5.8                 | 5.1                          | 5.5                 | 5.4                 | 5.6                 | 5.7                 |
| Postmenopausal                                 | -                            | -                   | -                   | -                   | -                   | 73.4                         | 73.2                | 75.1                | 78.4                | 80.6                |
| Use of exogenous female hormones               | -                            | -                   | -                   | -                   | -                   | 2.8                          | 2.8                 | 2.4                 | 2.6                 | 2.8                 |
| Coffee intake (>once/day)                      | 44.6                         | 39.1                | 33.2                | 29.2                | 23.8                | 49.1                         | 43.5                | 36.8                | 30.7                | 25.8                |
| Green tea intake (>once/day)                   | 45.7                         | 54.4                | 59.1                | 63.6                | 65.4                | 52.5                         | 60.5                | 63.7                | 65.5                | 65.6                |
| Median (interquartile range) dietary intake*   |                              |                     |                     |                     |                     |                              |                     |                     |                     |                     |
| Energy (kcal/day)                              | 2,055 (1,652–2,504)          | 2,079 (1,680–2,573) | 2,166 (1,764–2,615) | 2,095 (1,723–2,593) | 1,995 (1,632–2,457) | 1,756 (1,409–2,164)          | 1,751 (1,425–2,203) | 1,834 (1,512–2,251) | 1,822 (1,480–2,240) | 1,721 (1,398–2,077) |
| Fruit (g/day)                                  | 123 (57–215)                 | 127 (63–212)        | 136 (71–224)        | 145 (78–232)        | 152 (80–246)        | 184 (105–295)                | 194 (117–299)       | 199 (121–301)       | 207 (133–304)       | 210 (132–313)       |
| Vegetables (g/day)                             | 144 (90–216)                 | 160 (106–237)       | 169 (114–245)       | 171 (116–246)       | 177 (119–259)       | 176 (119–249)                | 193 (134–270)       | 201 (143–281)       | 209 (148–288)       | 209 (147–291)       |
| Fish (g/day)                                   | 73 (48–108)                  | 76 (51–110)         | 78 (53–111)         | 81 (56–115)         | 83 (56–118)         | 70 (46–102)                  | 74 (50–104)         | 77 (53–107)         | 80 (56–109)         | 80 (57–111)         |
| Meat (g/day)                                   | 60 (37–91)                   | 60 (38–88)          | 56 (35–83)          | 52 (34–76)          | 46 (28–68)          | 53 (33–82)                   | 52 (33–76)          | 50 (32–73)          | 47 (30–68)          | 40 (25–60)          |
| Total soy products (g/day)†                    | 43 (27–70)                   | 65 (49–94)          | 85 (69–113)         | 105 (89–132)        | 142 (118–177)       | 44 (28–70)                   | 62 (48–89)          | 82 (65–109)         | 101 (83–128)        | 134 (110–170)       |
| Natto (g/day)                                  | 1 (1–4)                      | 4 (1–10)            | 8 (2–15)            | 14 (6–23)           | 33 (21–48)          | 2 (1–4)                      | 5.4 (2–10)          | 10 (4–16)           | 17 (9–25)           | 35 (24–48)          |

|              |            |            |            |            |            |            |            |            |            |            |
|--------------|------------|------------|------------|------------|------------|------------|------------|------------|------------|------------|
| Miso (g/day) | 5 (2–8)    | 13 (9–17)  | 22 (15–26) | 27 (18–35) | 30 (21–42) | 4 (2–7)    | 11 (7–15)  | 18 (11–23) | 22 (13–29) | 25 (17–36) |
| Tofu (g/day) | 28 (16–51) | 31 (18–54) | 32 (19–55) | 33 (20–56) | 37 (21–63) | 30 (17–51) | 33 (20–53) | 35 (22–57) | 36 (22–59) | 39 (24–65) |

---

\*Food intake were adjusted for energy intake with the residual method.

†Sum of seven soy foods in the questionnaire. Along with total soy products, the table shows the amount of main soy products. The amount of miso was calculated from the amount of miso soup. Total tofu intake was calculated as the sum of the amount of tofu, tofu in miso soup, and other tofu products.

Supplemental Table 3. Baseline characteristics of participants according to their natto intake

| Characteristics                                | Men (n=42,750) <sup>§</sup> |                     |                     |                     |                     | Women (n=50,165) <sup>§</sup> |                     |                     |                     |                     |
|------------------------------------------------|-----------------------------|---------------------|---------------------|---------------------|---------------------|-------------------------------|---------------------|---------------------|---------------------|---------------------|
|                                                | Natto intake                |                     |                     |                     |                     | Natto intake                  |                     |                     |                     |                     |
|                                                | First                       | Second              | Third               | Fourth              | Fifth               | First                         | Second              | Third               | Fourth              | Fifth               |
| No of participants                             | 12450                       | 7575                | 7575                | 7575                | 7575                | 12227                         | 9484                | 9485                | 9484                | 9485                |
| Mean (SD) age (years)                          | 57.8 (8.2)                  | 55.1 (7.5)          | 55.0 (7.3)          | 55.6 (7.4)          | 57.2 (7.7)          | 58.9 (8.4)                    | 55.4 (7.6)          | 55.4 (7.4)          | 56.2 (7.5)          | 57.2 (7.5)          |
| Mean (SD) body mass index (kg/m <sup>2</sup> ) | 23.7 (3.0)                  | 23.5 (2.8)          | 23.5 (2.8)          | 23.5 (2.8)          | 23.5 (2.8)          | 23.7 (3.4)                    | 23.4 (3.1)          | 23.3 (3.1)          | 23.4 (3.0)          | 23.5 (3.1)          |
| Current smoker                                 | 44.7                        | 52.1                | 51.0                | 47.1                | 41.3                | 6.0                           | 6.2                 | 5.9                 | 5.7                 | 5.3                 |
| Alcohol intake (≥1 day/week)                   | 61.3                        | 72.5                | 74.0                | 71.4                | 67.5                | 9.1                           | 15.3                | 16.4                | 15.1                | 13.2                |
| Diabetes mellitus                              | 6.5                         | 6.3                 | 6.0                 | 7.3                 | 9.2                 | 3.7                           | 2.9                 | 3.3                 | 3.3                 | 4.8                 |
| Antihypertensive drugs                         | 18.6                        | 15.4                | 17.0                | 18.7                | 21.2                | 20.8                          | 16.7                | 17.8                | 19.1                | 22.4                |
| Health check-up                                | 77.0                        | 83.1                | 83.5                | 85.0                | 86.0                | 79.2                          | 84.5                | 85.5                | 86.8                | 87.5                |
| Sports or physical exercise (almost every day) | 5.8                         | 4.6                 | 4.5                 | 5.1                 | 7.2                 | 5.2                           | 4.8                 | 4.9                 | 5.2                 | 7.1                 |
| Postmenopausal                                 | -                           | -                   | -                   | -                   | -                   | 80.5                          | 71.5                | 71.9                | 75.9                | 80.1                |
| Use of exogenous female hormones               | -                           | -                   | -                   | -                   | -                   | 2.7                           | 3.2                 | 2.4                 | 2.4                 | 2.7                 |
| Coffee intake (>once/day)                      | 37.9                        | 37.6                | 34.4                | 30.1                | 27.9                | 40.9                          | 43.4                | 38.0                | 33.6                | 29.2                |
| Green tea intake (>once/day)                   | 44.9                        | 55.1                | 62.1                | 64.7                | 68.7                | 49.2                          | 59.1                | 64.6                | 68.3                | 69.6                |
| Median (interquartile range) dietary intake*   |                             |                     |                     |                     |                     |                               |                     |                     |                     |                     |
| Energy (kcal/day)                              | 1,900 (1,531–2,361)         | 2,128 (1,775–2,584) | 2,224 (1,921–2,610) | 2,207 (1,683–2,726) | 2,029 (1,734–2,526) | 1,590 (1,286–1,980)           | 1,822 (1,521–2,300) | 1,967 (1,608–2,217) | 1,918 (1,449–2,377) | 1,726 (1,474–2,120) |
| Fruit (g/day)                                  | 115 (50–206)                | 126 (63–207)        | 136 (75–222)        | 153 (89–239)        | 166 (92–261)        | 174 (93–285)                  | 188 (114–289)       | 201 (128–302)       | 213 (138–311)       | 221 (143–324)       |
| Vegetables (g/day)                             | 161 (100–246)               | 147 (96–218)        | 155 (106–225)       | 172 (121–242)       | 188 (128–268)       | 192 (128–275)                 | 184 (128–263)       | 191 (136–265)       | 203 (146–279)       | 219 (157–299)       |
| Fish (g/day)                                   | 70 (44–107)                 | 72 (50–105)         | 80 (57–111)         | 86 (61–119)         | 87 (60–121)         | 68 (43–103)                   | 71 (49–101)         | 79 (56–106)         | 82 (59–110)         | 83 (59–112)         |
| Meat (g/day)                                   | 61 (36–95)                  | 54 (34–81)          | 55 (36–78)          | 53 (34–76)          | 47 (30–70)          | 54 (32–85)                    | 50 (32–75)          | 50 (32–71)          | 47 (30–69)          | 41 (25–60)          |
| Total soy products (g/day) <sup>†</sup>        | 75 (45–115)                 | 73 (47–107)         | 85 (60–115)         | 100 (75–132)        | 131 (102–168)       | 69 (43–109)                   | 70 (45–104)         | 79 (56–109)         | 94 (70–124)         | 122 (95–160)        |
| Natto (g/day)                                  | 0 (0–0)                     | 4 (3–5)             | 10 (8–12)           | 19 (16–22)          | 38 (31–50)          | 0 (0–0)                       | 4 (3–6)             | 10 (9–12)           | 19 (16–22)          | 38 (31–49)          |
| Miso (g/day)                                   | 14 (7–24)                   | 16 (7–28)           | 18 (9–28)           | 19 (10–29)          | 20 (11–29)          | 11 (6–21)                     | 12 (6–22)           | 14 (7–23)           | 15 (8–23)           | 16 (9–25)           |

---

|              |            |            |            |            |            |            |            |            |            |            |
|--------------|------------|------------|------------|------------|------------|------------|------------|------------|------------|------------|
| Tofu (g/day) | 33 (18–62) | 28 (16–47) | 30 (18–50) | 34 (21–54) | 38 (23–65) | 34 (20–60) | 32 (18–56) | 32 (20–51) | 35 (22–55) | 39 (25–65) |
|--------------|------------|------------|------------|------------|------------|------------|------------|------------|------------|------------|

---

\*Food and nutrient intake were adjusted for energy intake with the residual method.

†Sum of seven soy foods in the questionnaire. Along with total soy products, the table shows the amount of main soy products. The amount of miso was calculated from the amount of miso soup. Total tofu intake was calculated as the sum of the amount of tofu, tofu in miso soup, and other tofu products.

§The first fifth of natto intake included participants who did not eat natto (n=12 450 men and 12 227 women). The remaining participants were divided into quarters and are shown in the second to fifth categories (7575 men and 9484, 9485, 9484, and 9485 women from the second to fifth categories, respectively). The first category comprises the lowest amount of soy product consumption and the fifth category is the highest.

Supplemental Table 4. Baseline characteristics of participants according to their miso intake

| Characteristics                                | Men (n=42,750) <sup>§</sup> |                     |                     |                     |                     | Women (n=50,165) <sup>§</sup> |                     |                     |                     |                     |
|------------------------------------------------|-----------------------------|---------------------|---------------------|---------------------|---------------------|-------------------------------|---------------------|---------------------|---------------------|---------------------|
|                                                | Miso intake                 |                     |                     |                     |                     | Miso intake                   |                     |                     |                     |                     |
|                                                | First                       | Second              | Third               | Fourth              | Fifth               | First                         | Second              | Third               | Fourth              | Fifth               |
| No of participants                             | 8,550                       | 8,550               | 8,550               | 8,550               | 8,550               | 10,033                        | 10,033              | 10,033              | 10,033              | 10,033              |
| Mean (SD) age (years)                          | 55.6 (8.1)                  | 56.3 (7.9)          | 56.2 (7.7)          | 56.3 (7.4)          | 57.1 (7.5)          | 56.1 (8.2)                    | 56.6 (8.2)          | 57.0 (7.9)          | 56.7 (7.5)          | 57.5 (7.5)          |
| Mean (SD) body mass index (kg/m <sup>2</sup> ) | 23.6 (2.9)                  | 23.6 (2.8)          | 23.6 (2.9)          | 23.6 (2.8)          | 23.6 (2.9)          | 23.2 (3.2)                    | 23.3 (3.2)          | 23.5 (3.1)          | 23.6 (3.1)          | 23.6 (3.2)          |
| Current smoker                                 | 47.7                        | 46.1                | 46.1                | 46.8                | 48.3                | 9.0                           | 6.0                 | 5.1                 | 4.6                 | 4.5                 |
| Alcohol intake (≥1 day/week)                   | 68.2                        | 70.5                | 70.5                | 70.0                | 63.1                | 18.9                          | 15.8                | 13.2                | 11.8                | 8.5                 |
| Diabetes mellitus                              | 7.2                         | 7.1                 | 7.0                 | 7.1                 | 6.6                 | 3.9                           | 3.5                 | 3.8                 | 3.3                 | 3.4                 |
| Antihypertensive drugs                         | 18.3                        | 18.9                | 19.1                | 17.8                | 17.1                | 19.4                          | 19.5                | 20.3                | 19.2                | 18.9                |
| Health check-up                                | 80.4                        | 83.0                | 83.6                | 83.7                | 80.5                | 81.9                          | 84.3                | 85.2                | 86.3                | 84.2                |
| Sports or physical exercise (almost every day) | 6.0                         | 6.1                 | 5.9                 | 5.1                 | 4.4                 | 5.7                           | 6.4                 | 6.0                 | 5.1                 | 4.0                 |
| Postmenopausal                                 | -                           | -                   | -                   | -                   | -                   | 69.3                          | 74.3                | 75.7                | 78.9                | 82.6                |
| Use of exogenous female hormones               | -                           | -                   | -                   | -                   | -                   | 2.7                           | 2.5                 | 2.6                 | 2.8                 | 2.9                 |
| Coffee intake (>once/day)                      | 43.0                        | 38.9                | 33.6                | 30.2                | 23.8                | 48.4                          | 42.7                | 36.1                | 32.9                | 25.5                |
| Green tea intake (>once/day)                   | 49.7                        | 57.9                | 61.1                | 61.4                | 58.2                | 57.8                          | 64.0                | 63.8                | 65.3                | 57.1                |
| Median (interquartile range) dietary intake*   |                             |                     |                     |                     |                     |                               |                     |                     |                     |                     |
| Energy (kcal/day)                              | 2,014 (1,648–2,453)         | 2,085 (1,754–2,509) | 2,302 (1,697–2,773) | 2,114 (1,777–2,650) | 1,990 (1,557–2,394) | 1,730 (1,393–2,168)           | 1,810 (1,495–2,257) | 1,780 (1,381–2,115) | 1,907 (1,662–2,298) | 1,591 (1,354–2,009) |
| Fruit (g/day)                                  | 131 (64–223)                | 141 (73–232)        | 140 (73–230)        | 140 (74–227)        | 131 (63–218)        | 193 (113–306)                 | 204 (127–307)       | 204 (128–307)       | 202 (127–300)       | 188 (113–289)       |
| Vegetables (g/day)                             | 146 (93–218)                | 167 (111–242)       | 174 (116–250)       | 174 (118–253)       | 162 (105–240)       | 180 (124–256)                 | 199 (140–273)       | 203 (143–284)       | 209 (150–289)       | 197 (135–281)       |
| Fish (g/day)                                   | 76 (50–109)                 | 82 (55–116)         | 80 (54–114)         | 80 (54–112)         | 75 (50–110)         | 73 (49–103)                   | 78 (53–109)         | 78 (54–107)         | 78 (53–109)         | 73 (49–103)         |
| Meat (g/day)                                   | 59 (37–88)                  | 56 (36–83)          | 55 (35–81)          | 53 (33–78)          | 49 (30–74)          | 51 (32–78)                    | 49 (31–72)          | 49 (31–71)          | 47 (30–70)          | 46 (27–69)          |
| Total soy products (g/day)†                    | 46 (28–78)                  | 68 (49–99)          | 88 (66–121)         | 105 (84–137)        | 133 (108–170)       | 49 (29–80)                    | 67 (47–96)          | 81 (61–111)         | 100 (79–132)        | 129 (103–164)       |
| Natto (g/day)                                  | 5 (1–13)                    | 6 (1–19)            | 9 (2–21)            | 11 (2–23)           | 10 (2–22)           | 6 (2–17)                      | 8 (2–20)            | 10 (2–22)           | 12 (4–25)           | 11 (3–23)           |
| Miso (g/day)                                   | 4 (2–6)                     | 11 (10–13)          | 19 (17–21)          | 26 (25–29)          | 38 (34–44)          | 3 (2–5)                       | 9 (8–11)            | 15 (13–17)          | 23 (21–24)          | 33 (29–38)          |

---

|              |            |            |            |            |            |            |            |            |            |            |
|--------------|------------|------------|------------|------------|------------|------------|------------|------------|------------|------------|
| Tofu (g/day) | 29 (16–51) | 32 (20–53) | 34 (20–58) | 34 (20–58) | 34 (19–59) | 30 (17–51) | 34 (21–55) | 35 (22–57) | 36 (22–59) | 38 (22–65) |
|--------------|------------|------------|------------|------------|------------|------------|------------|------------|------------|------------|

---

\*Food intake was adjusted for energy intake with the residual method.

†Sum of seven soy foods in the questionnaire. Along with total soy products, the table shows the amount of main soy products. The amount of miso was calculated from the amount of miso soup. Total tofu intake was calculated as the sum of the amount of tofu, tofu in miso soup, and other tofu products.



Supplemental Table 5. Hazard ratios (HRs) and 95% confidence intervals of all-cause mortality according to quintiles of total soy, fermented soy, and non-fermented soy product intake after excluding participants who died within the first 3 years

|                                             | Men (n=42,750) |                     |                     |                     |                     |                    | Women (n=50,165) |                     |                     |                     |                     |                    |
|---------------------------------------------|----------------|---------------------|---------------------|---------------------|---------------------|--------------------|------------------|---------------------|---------------------|---------------------|---------------------|--------------------|
|                                             | First          | Second              | Third               | Fourth              | Fifth               | P <sub>trend</sub> | First            | Second              | Third               | Fourth              | Fifth               | P <sub>trend</sub> |
| Total soy products (g/day)                  |                |                     |                     |                     |                     |                    |                  |                     |                     |                     |                     |                    |
| number of deaths                            | 1,357          | 1,418               | 1,461               | 1,517               | 1,753               |                    | 858              | 877                 | 842                 | 900                 | 1,045               |                    |
| 3 years exclusion Model 2                   | 1.00           | 0.96 (0.89 to 1.04) | 0.95 (0.89 to 1.03) | 0.93 (0.86 to 1.00) | 1.00 (0.93 to 1.08) | 0.88               | 1.00             | 1.01 (0.92 to 1.11) | 0.95 (0.86 to 1.04) | 0.96 (0.87 to 1.06) | 0.97 (0.88 to 1.08) | 0.38               |
| Fermented soy products <sup>†</sup> (g/day) |                |                     |                     |                     |                     |                    |                  |                     |                     |                     |                     |                    |
| number of deaths                            | 1,489          | 1,363               | 1,420               | 1,596               | 1,638               |                    | 924              | 888                 | 848                 | 893                 | 969                 |                    |
| 3 years exclusion Model 2                   | 1.00           | 0.91 (0.84 to 0.98) | 0.90 (0.83 to 0.97) | 0.96 (0.89 to 1.04) | 0.90 (0.83 to 0.98) | 0.13               | 1.00             | 0.99 (0.90 to 1.09) | 0.93 (0.84 to 1.03) | 0.93 (0.84 to 1.03) | 0.91 (0.82 to 1.01) | 0.05               |
| Non-fermented soy products (g/day)          |                |                     |                     |                     |                     |                    |                  |                     |                     |                     |                     |                    |
| number of deaths                            | 1,472          | 1,360               | 1,457               | 1,549               | 1,668               |                    | 964              | 835                 | 805                 | 872                 | 1,046               |                    |
| 3 years exclusion Model 2                   | 1.00           | 0.94 (0.88 to 1.02) | 0.99 (0.92 to 1.07) | 1.00 (0.92 to 1.07) | 1.03 (0.96 to 1.11) | 0.18               | 1.00             | 0.92 (0.84 to 1.02) | 0.85 (0.77 to 0.94) | 0.92 (0.83 to 1.00) | 0.98 (0.89 to 1.07) | 0.66               |

Model 2: We excluded participants who died within the first 3 years. Adjusted for age, geographical area, smoking, frequency of alcohol intake, body mass index, sports or physical exercise, history of diabetes or taking drugs for diabetes, taking antihypertensives, health check-up, postmenopausal status (women only), use of exogenous female hormones (women only), total energy intake, and the intake of green tea, coffee, fish, meat, fruit, and vegetables.

Supplemental Table 6. Hazard ratios (HRs) and 95% confidence intervals of all-cause mortality according to categories of soy product intake in Japanese

|                                             |      | Men (n=42,750)      |                     |                     |                     |       | Women (n=50,165)   |                     |                     |                     |                     |       |                    |
|---------------------------------------------|------|---------------------|---------------------|---------------------|---------------------|-------|--------------------|---------------------|---------------------|---------------------|---------------------|-------|--------------------|
|                                             |      | First               | Second              | Third               | Fourth              | Fifth | P <sub>trend</sub> | First               | Second              | Third               | Fourth              | Fifth | P <sub>trend</sub> |
| Total soy products (g/day)                  |      |                     |                     |                     |                     |       |                    |                     |                     |                     |                     |       |                    |
| Model 2                                     | 1.00 | 0.96 (0.89 to 1.03) | 0.94 (0.87 to 1.01) | 0.91 (0.84 to 0.98) | 0.98 (0.91 to 1.06) | 0.43  | 1.00               | 1.01 (0.92 to 1.11) | 0.95 (0.86 to 1.04) | 0.96 (0.87 to 1.06) | 0.98 (0.89 to 1.08) | 0.46  |                    |
| Model 2+area deprivation index              | 1.00 | 0.96 (0.89 to 1.03) | 0.94 (0.87 to 1.01) | 0.91 (0.84 to 0.98) | 0.98 (0.91 to 1.06) | 0.44  | 1.00               | 1.01 (0.92 to 1.11) | 0.94 (0.86 to 1.04) | 0.96 (0.87 to 1.05) | 0.98 (0.89 to 1.08) | 0.46  |                    |
| Fermented soy products <sup>†</sup> (g/day) |      |                     |                     |                     |                     |       |                    |                     |                     |                     |                     |       |                    |
| Model 2                                     | 1.00 | 0.92 (0.85 to 0.98) | 0.91 (0.85 to 0.98) | 0.95 (0.88 to 1.03) | 0.90 (0.83 to 0.97) | 0.05  | 1.00               | 0.95 (0.87 to 1.04) | 0.91 (0.83 to 1.00) | 0.90 (0.81 to 0.99) | 0.89 (0.80 to 0.98) | 0.01  |                    |
| Model 2+area deprivation index              | 1.00 | 0.91 (0.85 to 0.98) | 0.91 (0.85 to 0.98) | 0.95 (0.88 to 1.03) | 0.89 (0.83 to 0.97) | 0.05  | 1.00               | 0.95 (0.87 to 1.04) | 0.91 (0.83 to 1.00) | 0.89 (0.81 to 0.98) | 0.89 (0.80 to 0.98) | 0.01  |                    |
| Non-fermented soy products (g/day)          |      |                     |                     |                     |                     |       |                    |                     |                     |                     |                     |       |                    |
| Model 2                                     | 1.00 | 0.94 (0.87 to 1.01) | 1.00 (0.93 to 1.07) | 0.99 (0.92 to 1.06) | 1.01 (0.94 to 1.09) | 0.32  | 1.00               | 0.93 (0.85 to 1.02) | 0.84 (0.77 to 0.93) | 0.95 (0.86 to 1.04) | 1.00 (0.92 to 1.10) | 0.80  |                    |
| Model 2+area deprivation index              | 1.00 | 0.94 (0.88 to 1.01) | 1.00 (0.93 to 1.07) | 0.99 (0.93 to 1.07) | 1.01 (0.95 to 1.09) | 0.30  | 1.00               | 0.93 (0.85 to 1.02) | 0.85 (0.77 to 0.93) | 0.95 (0.87 to 1.04) | 1.00 (0.92 to 1.10) | 0.79  |                    |
| Natto (g/day)                               |      |                     |                     |                     |                     |       |                    |                     |                     |                     |                     |       |                    |
| Model 2                                     | 1.00 | 0.98 (0.91 to 1.05) | 1.00 (0.93 to 1.08) | 0.96 (0.89 to 1.03) | 0.94 (0.87 to 1.02) | 0.10  | 1.00               | 0.81 (0.74 to 0.89) | 0.90 (0.82 to 0.99) | 0.81 (0.74 to 0.90) | 0.84 (0.76 to 0.93) | 0.001 |                    |

|                                |      |                     |                     |                     |                     |      |      |                     |                     |                     |                     |       |
|--------------------------------|------|---------------------|---------------------|---------------------|---------------------|------|------|---------------------|---------------------|---------------------|---------------------|-------|
| Model 2+area deprivation index | 1.00 | 0.98 (0.91 to 1.05) | 1.00 (0.93 to 1.08) | 0.96 (0.89 to 1.04) | 0.94 (0.87 to 1.02) | 0.14 | 1.00 | 0.82 (0.74 to 0.90) | 0.90 (0.82 to 0.99) | 0.82 (0.74 to 0.90) | 0.84 (0.77 to 0.93) | 0.002 |
| Miso (g/day)                   |      |                     |                     |                     |                     |      |      |                     |                     |                     |                     |       |
| Model 2                        | 1.00 | 0.94 (0.87 to 1.01) | 0.92 (0.85 to 0.98) | 0.91 (0.85 to 0.98) | 0.95 (0.87 to 1.02) | 0.20 | 1.00 | 0.89 (0.81 to 0.97) | 0.87 (0.80 to 0.95) | 0.89 (0.81 to 0.98) | 0.89 (0.81 to 0.97) | 0.03  |
| Model 2+area deprivation index | 1.00 | 0.94 (0.87 to 1.01) | 0.92 (0.85 to 0.98) | 0.91 (0.85 to 0.98) | 0.95 (0.88 to 1.02) | 0.18 | 1.00 | 0.89 (0.81 to 0.97) | 0.87 (0.80 to 0.95) | 0.89 (0.81 to 0.98) | 0.88 (0.80 to 0.97) | 0.03  |
| Tofu (g/day)                   |      |                     |                     |                     |                     |      |      |                     |                     |                     |                     |       |
| Model 2                        | 1.00 | 0.94 (0.87 to 1.01) | 0.97 (0.91 to 1.04) | 0.98 (0.91 to 1.05) | 0.99 (0.92 to 1.06) | 0.88 | 1.00 | 0.92 (0.84 to 1.00) | 0.86 (0.79 to 0.95) | 0.90 (0.82 to 0.99) | 0.95 (0.86 to 1.03) | 0.21  |
| Model 2+area deprivation index | 1.00 | 0.94 (0.88 to 1.01) | 0.98 (0.91 to 1.05) | 0.98 (0.91 to 1.05) | 0.99 (0.92 to 1.06) | 0.85 | 1.00 | 0.92 (0.84 to 1.01) | 0.87 (0.79 to 0.95) | 0.90 (0.82 to 0.99) | 0.95 (0.86 to 1.03) | 0.21  |

Model 2 is adjusted for age, geographical area, smoking, frequency of alcohol intake, body mass index, sports or physical exercise, history of diabetes or taking drugs for diabetes, taking antihypertensives, health check-up, postmenopausal status (women only), use of exogenous female hormones (women only), total energy intake, and the intake of green tea, coffee, fish, meat, fruit, and vegetables. Area deprivation index: Areal deprivation indicators for each of the 263 areas by using the 1995 census. Details of this indicator was described in the article by Nakaya et al. (PLoS One. 2014:e97802).

\* Except for natto intake the first to fifth categories comprised 8550 men and 10 330 women. The first fifth of natto intake included participants who did not eat natto (n=12 450 men and 12 227 women). The remaining participants were divided into quarters and are shown in the second to fifth categories (7575 men and 9484, 9485, 9484, and 9485 women from the second to fifth categories, respectively). The first category comprises the lowest amount of soy product consumption and the fifth category is the highest.
